# Supplementary material
Source: publisher figshare collection journal article supplement (https://acs.figshare.com/ndownloader/files/5103466)
Supplement: Supplementary file 1 [file 5103466]

***Recent Reviews. 78***

compiled by Veronica M. Cornel

## Department of Chemistry, Reedley College, 339 W. Carpenter Ave, Reedley, California 93654

Reviews are listed in order of appearance in the sources indicated. In multidisciplinary review journals, only those reviews which fall within the scope of this Journal are included. Sources are listed alphabetically in three categories: regularly issued review journals and series volumes, contributed volumes, and other monographs. Titles are numbered serially, and these numbers are used for reference in the index.

Major English-language sources of critical reviews are covered. Encyclopedic treatises, annual surveys such as *Specialist Periodical Reports*, and compilations of symposia proceedings are omitted.

This installment of Recent Reviews covers principally the early part of the 2005 literature. Previous installment: *J. Org. Chem*.**2005**, 70(14), 5772-80.

**Supporting Information Available:** A file containing this Recent Review compilation in Microsoft Word and the data in plain text that can be imported into Endnote (using Refer style) and Reference Manager databases. This material is available free of charge via the Internet at http://pubs.acs.org.

**Regularly Issued Journals and Series Volumes**

**Accounts of Chemical Research**

**1.** Metrangolo, P.; Neukirch, H.; Pilati, T.; Resnati, G. Halogen Bonding Based Recognition Processes: A World Parallel to Hydrogen Bonding. **2005**, *38*(5), 386-95.

**2.** de Meijere, A.; von Zezschwitz, P.; Braese, S. The Virtue of Palladium-Catalyzed Domino Reactions - Diverse Oligocyclizations of Acyclic 2-Bromoenynes and 2-Bromoenediynes. **2005**, *38*(5), 413-22.

**3.** Kadota, I.; Yamamoto, Y. Synthetic Strategies of Marine Polycyclic Ethers via Intramolecular Allylations: Linear and Convergent Approaches. **2005**, *38*(5), 423-32.

**4.** Avalos, M.; Babiano, R.; Cintas, P.; Jimenez, J. L.; Palacios, J. C. Exploiting Synthetic Chemistry with Mesoionic Rings: Improvements Achieved with Thioisomuenchnones. **2005**, *38*(6), 460-8.

**5.** Willets, K. A.; Nishimura, S. Y.; Schuck, P. J.; Twieg, R. J.; Moerner, W. E. Nonlinear Optical Chromophores as Nanoscale Emitters for Single-Molecule Spectroscopy. **2005**, *38*(7), 549-56.

**6.** Belkova, N. V.; Shubina, E. S.; Epstein, L. M. Diverse World of Unconventional Hydrogen Bonds. **2005**, *38*(8), 624-31.

**7.** Okuyama, T.; Fujita, M. Generation of Cycloalkynes by Hydro-Iodonio-Elimination of Vinyl Iodonium Salts. **2005**, *38*(8), 679-86.

**Advances in Photochemistry**

**8.** D'Auria, M.; Emanuele, L.; Racioppi, R. 1,2-Cycloaddition Reaction of Carbonyl Compounds and Pentaatomic Heterocyclic Compounds. **2005**, *2005*(28), 81-127.

**Advances in Physical Organic Chemistry**

**9.** Richard, J. P.; Amyes, T. L.; Toteva, M. M.; Tsuji, Y. Dynamics for the Reactions of Ion Pair Intermediates of Solvolysis. **2004**, *2004*(39), 1-26.

**10.** Speranza, M. Chiral Clusters in the Gas Phase.**2004**, *2004*(39), 147-281.

**Angewandte Chemie, International Edition in English**

**11.** Gossage, R. A.; Jastrzebski, J. T. B. H.; van Koten, G. Hetero-Aggregate Compounds of Aryl and Alkyl Lithium Reagents: A Structurally Intriguing Aspect of Organolithium Chemistry.**2005**, *44*(10), 1448-54.

**12.** Ramon, D. J.; Yus, M. Asymmetric Multicomponent Reactions (AMCRs): The New Frontier.**2005**, *44*(11), 1602-34.

**13.** Bolm, C.; Rantanen, T.; Schiffers, I.; Zani, L. Protonated Chiral Catalysts: Versatile Tools for Asymmetric Synthesis.**2005**, *44*(12), 1758-63.

**14.** Wallace, D. J. Relay Ring-Closing Metathesis - A Strategy for Achieving Reactivity and Selectivity in Metathesis Chemistry.**2005**, *44*(13), 1912-5.

**15.** Yamamoto, H.; Futatsugi, K. "Designer Acids": Combined Acid Catalysis for Asymmetric Synthesis.**2005**, *44*(13), 1924-42.

**16.** Rebek, J., Jr. Simultaneous Encapsulation: Molecules Held at Close Range.**2005**, *44*(14), 2068-78.

**17.** Kazmaier, U. Amino Acids-Valuable Organocatalysts in Carbohydrate Synthesis.**2005**, *44*(15), 2186-8.

**18.** Oestreich, M. Strategies for Catalytic Asymmetric Electrophilic -Halogenation of Carbonyl Compounds.**2005**, *44*(16), 2324-7.

**19.** Bruneau, C. Electrophilic Activation and Cycloisomerization of Enynes: A New Route to Functional Cyclopropanes.**2005**, *44*(16), 2328-34.

**20.** Kirmse, W. Incarcerated Carbenes.**2005**, *44*(17), 2476-9.

**21.** Meier, H. Conjugated Oligomers with Terminal Donor-Acceptor Substitution.**2005**, *44*(17), 2482-506.

**22.** Christmann, M. New Developments in the Asymmetric Stetter Reaction.**2005**, *44*(18), 2632-4.

**23.** Katz, T. J. Olefin Metatheses and Related Reactions Initiated by Carbene Derivatives of Metals in Low Oxidation States.**2005**, *44*(20), 3010-9.

**24.** Gibson, S. E.; Mainolfi, N. The Intermolecular Pauson-Khand Reaction.**2005**, *44*(20), 3022-37.

**Australian Journal of Chemistry**

**25.** Loughlin, W. A. A Facile Approach to Bicyclo[n.2.0]alkan-1-ols: An Overview.**2004**, *57*(4), 335-8.

**26.** Aitken, S. G.; Abell, A. D. Olefin Metathesis: Catalyst Development, Microwave Catalysis, and Domino Applications. **2005**, *58*(1), 3-13.

**Canadian Journal of Chemistry**

**27.** Brown, R. S.; Neverov, A. A.; Tsang, J. S. W.; Gibson, G. T. T.; Montoya-Pelaez, P. J. 2004 Bader Award Lecture. Metal-Ion-Catalyzed Acyl and Phosphoryl Transfer Reactions to Alcohols: La3+-Promoted Alcoholysis of Activated Amides, Carboxylate Esters, and Neutral Organophosphorus Esters. **2004**, *82*(12), 1791-805.

**28.** Guthrie, J. P. 2003 Alfred Bader Award Lecture, Predicting the Rates of Chemical Reactions. **2005**, *83*(1), 1-8.

**29.** Franzen, R.; Xu, Y. Review on Green Chemistry - Suzuki Cross Coupling in Aqueous Media. **2005**, *83*(3), 266-72.

**Chemical Reviews**

**30.** Kottas, G. S.; Clarke, L. I.; Horinek, D.; Michl, J. Artificial Molecular Rotors.**2005**, *105*(4), 1281-376.

**31.** Hoeben, F. J. M.; Jonkheijm, P.; Meijer, E. W.; Schenning, A. P. H. J. About Supramolecular Assemblies of -Conjugated Systems. **2005**, *105*(4), 1491-546.

**32.** McGarrigle, E. M.; Gilheany, D. G. Chromium- and Manganese-Salen Promoted Epoxidation of Alkenes. **2005**, *105*(5), 1563-602.

**33.** Xia, Q. H.; Ge, H. Q.; Ye, C. P.; Liu, Z. M.; Su, K. X. Advances in Homogeneous and Heterogeneous Catalytic Asymmetric Epoxidation. **2005**, *105*(5), 1603-62.

**34.** Crespo, L.; Sanclimens, G.; Pons, M.; Giralt, E.; Royo, M.; Albericio, F. Peptide and Amide Bond-Containing Dendrimers. **2005**, *105*(5), 1663-81.

**35.** Jung, M. E.; Piizzi, G. *gem*-Disubstituent Effect: Theoretical Basis and Synthetic applications. **2005**, *105*(5), 1735-66.

**36.** Berthod, M.; Mignani, G.; Woodward, G.; Lemaire, M. Modified BINAP: The How and the Why. **2005**, *105*(5), 1801-36.

**37.** Macchioni, A. Ion Pairing in Transition-Metal Organometallic Chemistry. **2005**, *105*(6), 2039-73.

**38.** Punniyamurthy, T.; Velusamy, S.; Iqbal, J. Recent Advances in Transition Metal Catalyzed Oxidation of Organic Substrates with Molecular Oxygen. **2005**, *105*(6), 2329-63.

**39.** Lersch, M.; Tilset, M. Mechanistic Aspects of C-H Activation by Pt Complexes. **2005**, *105(6*), 2471-526.

**40.** Dupont, J.; Consorti, C. S.; Spencer, J. The Potential of Palladacycles: More Than Just Precatalysts. **2005**, *105*(6), 2527-71.

**Chemical Society Reviews**

**41.** Juaristi, E.; Notario, R.; Roux, M. V. Calorimetric and Computational Study of Sulfur-Containing Six-Membered Rings. **2005**, *34*(4), 347-54.

**42.** Antonello, S.; Maran, F. Intramolecular Dissociative Electron Transfer. **2005**, *34*(5), 418-428.

**Chemistry of Heterocyclic Compounds**

**43.** Sadekov, I. D.; Minkin, V. I. Benzo[b]tellurophene, Dibenzo[b,d]tellurophene, and Their Derivatives. **2004**, *40*(7), 834-53.

**44.** Yurovskaya, M. A. Chemistry of Heterocyclic Compounds at the Department of Organic Chemistry, Chemical Faculty, M. V. Lomonosov State University. (Review). **2005**, *41*(1), 24-78.

**CHEMTRACTS: Organic Chemistry**

**45.** Calhorda, M. J.; Vaz, P. D. Group Transfer from Nickel Imido, Phosphinidene, and Carbene Complexes to Ethylene with Formation of Aziridine, Phosphirane, and Cyclopropane Products. Observation of the Enhancement in Enantioselectivity with Conversion for the Aziridination of Styrene Using Copper Bis(Oxazoline) Complexes. **2004**, *17*(7), 396-400.

**46.** Kresge, A. J. The Crystal Structure of a Simple Enol Formed in a Single-Crystal-to- Single-Crystal Enolene Rearrangement. **2004**, *17*(8), 407-8.

**47.** Harmota, M. The Nazarov Reaction: Substituent Effects, Catalysis and Asymmetric Catalysis. **2004**, *17*(8), 416-35.

**48.** Kresge, A. J. Wolff Rearrangement of 2-Diazo-1(2H)-Naphthalenone Induced by Nonresonant Two-Photon Absorption of NIR Radiation. **2004**, *17*(8), 456-8.

**Chirality**

**49.** Ghanem, A.; Aboul-Enein, H. Y. Application of Lipases in Kinetic Resolution of Racemates. **2004**, *17*(1), 1-15.

**50.** Ding, J.; Armstrong, D. W. Chiral Ionic Liquids. Synthesis and Applications. **2005**, *17*(5), 281-92.

### Current Medicinal Chemistry

**51.** Cowell, S. M.; Lee, Y. S.; Cain, J. P.; Hruby, V. J. Exploring Ramachandran and Chi Space: Conformationally Constrained Amino Acids and Peptides in the Design of Bioactive Polypeptide Ligands.**2004**, *11*(21), 2785-98.

**52.** Sagan, S.; Karoyan, P.; Lequin, O.; Chassaing, G.; Lavielle, S. N- and C-Methylation in Biologically Active Peptides: Synthesis, Structural and Functional Aspects.**2004**, *11*(21), 2799-822.

**53.** Reissmann, S.; Imhof, D. Development of Conformationally Restricted Analogs of Bradykinin and Somatostatin Using Constrained Amino Acids and Different Types of Cyclization.**2004**, *11*(21), 2823-44.

**54.** Obreza, A.; Gobec, S. Recent Advances in Design, Synthesis and Biological Activity of Aminoalkylsulfonates and Sulfonamidopeptides.**2004**, *11*(24), 3263-78.

### Current Organic Chemistry

**55.** Palacios, F.; Alonso, C.; de los Santos, J. M. -Phosphono- and Phosphinopeptides Derived from -Amino- Phosphonic and Phosphinic acids.**2004**, *8*(15), 1481-96.

**56.** Knauer, S.; Kranke, B.; Krause, L.; Kunz, H. Amino Sugars and Glycosylamines as Tools in Stereoselective Synthesis. **2004**, *8*(18), 1739-61.

**57.** Galeazzi, R.; Mobbili, G.; Orena, M. Modeling and Synthesis of Conformationally Restricted Amino Acids. **2004**, *8*(18), 1799-829.

**58.** Hengge, A. C.; Onyido, I. Physical Organic Perspectives on Phospho Group Transfer from Phosphates and Phosphinates. **2005**, *9*(1), 61-74.

**59.** Michelet, V.; Genet, J.-P. An Overview of Synthetic and Biological Studies of Ambruticin and Analogues. **2005**, *9*(5), 405-18.

**60.** Yamamoto, Y. Recent Advances in Intramolecular Alkyne Cyclotrimerization and Its Applications. **2005**, *9*(6), 503-19.

**61.** Takemura, H. A Survey of Interaction in Some Macrocyclic Compounds.**2005**, *9*(6), 521-33.

**62.** Bai, L.; Wang, J. X. Environmentally Friendly Suzuki Aryl-Aryl Cross-Coupling Reaction. **2005**, *9*(6), 535-53.

**63.** Shaughnessy, K. H.; DeVasher, R. B. Palladium-Catalyzed Cross-Coupling in Aqueous Media: Recent Progress and Current Applications. **2005**, *9*(7), 585-604.

**64.** Louie, J. Transition Metal-Catalyzed Reactions of Carbon Dioxide and Other Heterocumulenes. **2005**, *9*(7), 605-23.

**65.** Wolfe, J. P.; Thomas, J. S. Recent Developments in Palladium-Catalyzed Heterocycle Synthesis and Functionalization.**2005**, *9*(7), 625-55.

**66.** Halfen, J. A. Recent Advances in Metal-Mediated Carbon-Nitrogen Bond Formation Reactions. Aziridination and Amidation. **2005**, *9*(7), 657-69.

**67.** Goj, L. A.; Gunnoe, T. B. Developments in Catalytic Aromatic C-H Transformations. Promising Tools for Organic Synthesis.**2005**, *9*(7), 671-85.

**68.** Clarke, M. L. Branched Selective Hydroformylation. A Useful Tool for Organic Synthesis.**2005**, *9*(7), 701-18.

**69.** Fox, J. M.; Yan, N. Metal-Mediated and -Catalyzed Nucleophilic Additions to Cyclopropenes.**2005**, *9*(7), 719-32.

**70.** Graden, H.; Kann, N. Solid Phase Synthesis Using Organometallic Reagents.**2005**, *9*(8), 733-63.

**71.** Zhou, Z.; Wilson, S. R. Tether-Directed Multiple Functionalization of Fullerene[60].**2005**, *9*(8), 789-811.

**72.** Lunardi, C. N.; Tedesco, A. C. Synergic Photosensitizers: A New Trend in Photodynamic Therapy.**2005**, *9*(8), 813-21.

**73.** Pinho e Melo, T. M. V. D. Recent Advances on the Synthesis and Reactivity of Isoxazoles.**2005**, *9*(10), 925-58.

**74.** Handy, S. T. Room Temperature Ionic Liquids: Different Classes and Physical Properties.**2005**, *9*(10), 959-88.

**Current Organic Synthesis**

**75.** Molteni, V.; Ellis, D. A. Recent Advances in Microwave-Assisted Synthesis of Heterocyclic Compounds.**2005**, *2*(3), 333-75.

**76.** Singh, G. S. Reactions of Organic Nitrogen Compounds with Carbenoids and Diarylketenes from Diazoalkanes and Diazocarbonyls.**2005**, *2*(3), 377-91.

**77.** Martins da Silva, F.; Jones, J., Jr.; de Mattos, M. C. S. A Centennial Methodology for the Preparation of Heterocyclic Compounds: The Intramolecular Coiodination of Alkenes with Internal Oxygenated Nucleophiles.**2005**, *2*(3), 393-414.

**78.** Li, J.-T.; Wang, S.-X.; Chen, G.-F.; Li, T.-S. Some Applications of Ultrasound Irradiation in Organic Synthesis.**2005**, *2*(3), 415-36.

**Heterocycles**

**79.** Harayama, T. Synthesis of Benzo[*c*]phenanthridine Alkaloids Using a Palladium-Catalyzed Aryl-Aryl Coupling Reaction. **2005**, *65*(3), 697-713.

**80.** Abass, M. Fused Quinolines. Recent Synthetic Approaches to Azoloquinolines. A Review. **2005**, *65*(4), 901-65.

**Journal of Combinatorial Chemistry**

**81.** Dolle, R. E. Comprehensive Survey of Combinatorial Library Synthesis: 2003. **2004**, *6*(5), 623-679.

**82.** Ziegert, R. E.; Toraeng, J.; Knepper, K.; Braese, S. The Recent Impact of Solid-Phase Synthesis on Medicinally Relevant Benzoannelated Oxygen Heterocycles. **2005**, *7*(2), 147-69.

**Journal of Heterocyclic Chemistry**

**83.** Tominaga, Y.; Ueda, K. Synthesis of Dimethyl Heterocyclic-O-Dicarboxylates Using Dimethyl Acetylenedicarboxylate.**2005**, *42*(3), 337-52.

**84.** Kim, S.-K.; Kweon, D.-H.; Cho, S.-D.; Kang, Y.-J.; Park, K.-H.; Lee, S.-G.; Yoon, Y.-J. Functionalization and Synthetic Application of Pyridazin-3(2H)-ones.**2005**, *42*(3), 353-9.

**85.** Svete, J. Synthesis of Functionalized Compounds Containing Pyridazine and Related Moieties.**2005**, *42*(3), 361-73.

**86.** Pozharskii, A. F.; Gulevskaya, A. V. Pyrimido[4,5-*c*]pyridazine-5,7(6*H*,8*H*)-diones: Marvelous Substrates for Study of Nucleophilic Substitution of Hydrogen.**2005**, *42*(3), 375-85.

**87.** Kurasawa, Y.; Kim, H. S. Synthesis of Biologically Active Pyridazinoquinoxalines.**2005**, *42*(3), 387-93.

**88.** Polanc, S. New Synthetic Applications and Biological Activity of Diazenes.**2005**, *42*(3), 401-12.

**89.** Gulevskaya, A. V.; Van Dang, S.; Pozharskii, A. F. Synthesis and Heterocyclizations of 3-Alkynyl-6,8-Dimethylpyrimido[4,5- *c*]pyridazine-5,7(6*H*,8*H*)-Diones and Their Lumazine Analogues.**2005**, *42*(3), 413-9.

**90.** Hajos, G.; Riedl, Z.; Matyus, P.; Maes, B. U. W.; Lemiere, G. L. F. Cyclizations to New Azolopyridazines and Related Ring Systems.**2005**, *42*(3), 421-6.

**91.** Hideg, K.; Kalai, T.; Sar, C. P. Recent Results in Chemistry and Biology of Nitroxides.**2005**, *42*(3), 437-50.

**92.** Keglevich, G. "ESHC (Sopron) Plenary Lecture" Exciting Fields in P-Heterocyclic Chemistry.**2005**, *42*(3), 451-62.

**93.** Bakke, J. M. Nitropyridines, Their Synthesis and Reactions.**2005**, *42*(3), 463-74.

**Journal of Organometallic Chemistry**

**94.** Hoge, B.; Neufeind, S.; Hettel, S.; Wiebe, W.; Thoesen, C. Stable Phosphinous Acids.**2005**, *690*(10), 2382-7.

**95.** Montchamp, J.-L. Recent Advances in Phosphorus-Carbon Bond Formation: Synthesis of H-Phosphinic Acid Derivatives from Hypophosphorous Compounds.**2005**, *690*(10), 2388-406.

**96.** Doux, M.; Moores, A.; Mezailles, N.; Ricard, L.; Jean, Y.; Le Floch, P. The CO/PC Analogy in Coordination Chemistry and Catalysis.**2005**, *690*(10), 2407-15.

**97.** Cristau, H.-J.; Pirat, J.-L.; Virieux, D.; Monbrun, J.; Ciptadi, C.; Bekro, Y.-A. Synthesis, Reactivity and Stereochemistry of New Phosphorus Heterocycles with 5- or 6-Membered Rings.**2005**, *690*(10), 2472-81.

**98.** Hissler, M.; Lescop, C.; Reau, R. Organophosphorus -Conjugated Materials: The Rise of a New Field.**2005**, *690*(10), 2482-7.

**99.** Mikolajczyk, M. Acyclic and Cyclic Aminophosphonic Acids: Asymmetric Syntheses Mediated by Chiral Sulfinyl Auxiliary.**2005**, *690*(10), 2488-96.

**100.** Al-Quntar, A. A.-A.; Srebnik, M. Reactions of 1-Alkynylphosphonates with Group (IV) Complexes.**2005**, *690*(10), 2504-14.

**101.** Stibr, B. Chemistry Related to Cluster-Borane Analogues of the Cyclopentadienide Anion and Ferrocene: New Developments.**2005**, *690*(11), 2694-700.

**102.** Bould, J.; Bown, M.; Coldicott, R. J.; Ditzel, E. J.; Greenwood, N. N.; Macpherson, I.; MacKinnon, P.; Thornton-Pett, M.; Kennedy, J. D. Metallaborane Reaction Chemistry. Part 12. Some Interactions of Acetylenes and Isocyanides with Selected Metallaboranes.**2005**, *690*(11), 2701-20.

**Journal of Physical Organic Chemistry**

**103.** Chiappe, C.; Pieraccini, D. Ionic Liquids: Solvent Properties and Organic Reactivity. **2005**, *18*(4), 275-97.

**104.** Marcus, Y. Solvatochromic Probes in Supercritical Fluids.**2005**, *18*(5), 373-84.

**Natural Product Reports**

**105.** Ma, X.; Gang, D. R. The Lycopodium Alkaloids.**2004**, *21*(6), 752-72.

**106.** Somei, M.; Yamada, F. Simple Indole Alkaloids and Those with a Non-Rearranged Monoterpenoid Unit.**2005**, *22*(1), 73-103.

**107.** Jin, Z. Muscarine, Imidazole, Oxazole, and Thiazole Alkaloids.**2005**, *22*(2), 196-229.

**108.** Bentley, K. W. -Phenylethylamines and the Isoquinoline Alkaloids.**2005**, *22*(2), 249-68.

**109.** Bermejo, A.; Figadere, B.; Zafra-Polo, M.-C.; Barrachina, I.; Estornell, E.; Cortes, D. Acetogenins from Annonaceae. Recent Progress in Isolation, Synthesis, and Mechanisms of Action.**2005**, *22*(2), 269-303.

**Organic Preparations and Procedures International**

**110.** Clive, D. L. J.; Wang, J. Synthesis of the Hamigerans. A Review.**2005**, *37*(1), 1-35.

**111.** Syamala, M. A Decade of Advances in Three-Component Reactions. A Review. **2005**, *37*(2), 103-71.

**Photochemistry**

**112.** Horspool, W. M. Enone Cycloadditions and Rearrangements: Photoreactions of Dienones and Quinones.**2003**, *2003*(34), 29-67.

**113.** Gilbert, A. Photochemistry of Aromatic Compounds. **2004**, *2004*(35), 79-115.

**Pure and Applied Chemistry**

**114.** Foti, M. C.; Sharma, S. K.; Shakya, G.; Prasad, A. K.; Nicolosi, G.; Bovicelli, P.; Ghosh, B.; Raj, H. G.; Rastogi, R. C.; Parmar, V. S. Biopolyphenolics as Antioxidants: Studies Under an Indo-Italian CSIR-CNR Project.**2005**, *77*(1), 91-101.

**115.** Baron, A.; Ball, M.; Bradshaw, B.; Donnelly, S.; Germany, O.; Oller, P. C.; Kumar, N.; Martin, N.; O'Brien, M.; Omori, H.; Moore, C.; Thomas, E. J. Approaches to the Stereoselective Total Synthesis of Biologically Active Natural Products.**2005**, *77*(1), 103-17.

**116.** Vogel, P.; Gerber-Lemaire, G.; Carmona, A. T.; Meilert, K. T.; Schwenter, M.-E. Noniterative Approach to the Total Asymmetric Synthesis of 15-Carbon Polyketides and Analogs with High Stereodiversity.**2005**, *77*(1), 131-7.

**117.** Lee, H.-K.; Chan, K.-F.; Hui, C.-W.; Yim, H.-K.; Wu, X.-W.; Wong, H. N. C. Use of Furans in Synthesis of Bioactive Compounds.**2005**, *77*(1), 139-43.

**118.** Dallinger, D.; Kappe, C. O. Creating Chemical Diversity Space by Scaffold Decoration of Dihydropyrimidines.**2005**, *77*(1), 155-61.

**119.** Arya, P.; Quevillon, S.; Joseph, R.; Wei, C. Q.; Gan, Z.; Parisien, M.; Sesmilo, E.; Reddy, P. T.; Chen, Z. X.; Durieux, P.; Laforce, D.; Campeau, L. C.; Khadem, S.; Couve-Bonnaire, S.; Kumar, R.; Sharma, U.; Leek, D. M.; Daroszewska, M.; Barnes, M. L. Toward the Library Generation of Natural Product-Like Polycyclic Derivatives by Stereocontrolled Diversity-Oriented Synthesis.**2005**, *77*(1), 163-78.

**120.** Jain, S. C.; Kumar, R.; Goswami, R.; Pandey, M. K.; Khurana, S.; Rohatgi, L.; Gyanda, K. Synthesis of Novel Non-Isoprenoid Phenolic Acids and 3-Alkylpyridines.**2005**, *77*(1), 185-93.

**121.** Sharma, S. K.; Husain, M.; Kumar, R.; Samuelson, L. A.; Kumar, J.; Watterson, A. C.; Parmar, V. S. Biocatalytic Routes Toward Pharmaceutically Important Precursors and Novel Polymeric Systems.**2005**, *77*(1), 209-26.

**Russian Chemical Reviews**

**122.** Zatsepin, T. S.; Romanova, E. A.; Oretskaya, T. S. Nucleosides and Oligonucleotides Containing 2'-Reactive Groups: Synthesis and Applications.**2004**, *73*(7), 701-33.

**123.** Komarov, I. V.; Grigorenko, A. O.; Turov, A. V.; Khilya, V. P. Conformationally Rigid Cyclic -Amino Acids in the Design of Peptidomimetics, Peptide Models and Biologically Active Compounds.**2004**, *73*(8), 785-810.

**124.** Buchachenko, A. L.; Berdinsky, V. L. Spin Catalysis as a New Type of Catalysis in Chemistry.**2004**, *73*(11), 1033-9.

**125.** Khlebnikov, A. F.; Novikov, M. S.; Kostikov, R. R. Iminium Ylides from Carbenes and Carbenoids. Generation and Synthetic Applications.**2005**, *74*(2), 171-92.

**126.** Litvinov, V. P. The Latest Achievements in Thienothiophene Chemistry.**2005**, *74*(3), 217-48.

**Science**

**127.** Clarkson, J. R.; Baquero, E.; Shubert, V. A.; Myshakin, E. M.; Jordan, K. D.; Zwier, T. S. Laser-Initiated Shuttling of a Water Molecule between H-Bonding Sites. **2005**, *307*(5714), 1443-6.

**128.** Bunz, U. H. F. Chemistry: How are Alkynes Scrambled? **2005**, *308*(5719), 216-7.

**129.** Khosla, C.; Tang, Y. Chemistry: A New Route to Designer Antibiotics. **2005**, *308*(5720), 367-8.

**130.** Charest, M. G.; Lerner, C. D.; Brubaker, J. D.; Siegel, D. R.; Myers, A. G. A Convergent Enantioselective Route to Structurally Diverse 6-Deoxytetracycline Antibiotics. **2005**, *308*(5720), 395-8.

**131.** Taatjes, C. A.; Hansen, N.; McIlroy, A.; Miller, J. A.; Senosiain, J. P.; Klippenstein, S. J.; Qi, F.; Sheng, L.; Zhang, Y.; Cool, T. A.; Wang, J.; Westmoreland, P. R.; Law, M. E.; Kasper, T.; Kohse-Hoeinghaus, K. Enols are Common Intermediates in Hydrocarbon Oxidation. **2005**, *308*(5730), 1887-9.

**Synlett**

**132.** Rinner, U.; Hudlicky, T. Synthesis of Amaryllidaceae Constituents - An Update.**2005**, (3), 365-87.

**133.** Gogoi, S. HOF·CH3CN Complex.**2005**, (3), 541-2.

**134.** Mishra, J. K. Oxaziridines.**2005**, (3), 543-4.

**135.** Park, K. H.; Chung, Y. K. The Pauson-Khand-Type Reaction Catalyzed by Transition Metal Nanoparticles.**2005**, (4), 545-59.

**136.** Fujita, K.-i.; Yamaguchi, R. Cp*Ir Complex-Catalyzed Hydrogen Transfer Reactions Directed Toward Environmentally Benign Organic Synthesis.**2005**, (4), 560-71.

**137.** Dubbaka, S. R. Tri-tert-butylphosphine [P(*t*-Bu)3]: An Electron-Rich Ligand for Palladium in Cross-Coupling Reactions.**2005,** (4), 709-10.

**138.** Zhang, Z.-H. Indium Tribromide: A Water-Tolerant Green Lewis Acid.**2005**, (4), 711-2.

**139.** Kinbara, K. Design of Resolving Agents Based on Crystal Engineering.**2005**, (5), 732-43.

**140.** Dalaigh, C. O. Cinchona Alkaloid Derivatives as Chiral Organocatalysts.**2005**, (5), 875-6.

**141.** Zhang, Z. Nickel(0) Catalysts in Organic Synthesis.**2005**, (5), 877-8.

**142.** Georghiou, P. E.; Li, Z.; Ashram, M.; Chowdhury, S.; Mizyed, S.; Tran, A. H.; Al-Saraierh, H.; Miller, D. O. Calixnaphthalenes: Deep, Electron-Rich Naphthalene Ring-Containing Calixarenes. The First Decade.**2005**, (6), 879-91.

**143.** Chen, F.-X.; Feng, X. Synthesis of Racemic Tertiary Cyanohydrins.**2005,** (6), 892-9.

**144.** Adam, W.; Zhang, A. Chiral Auxiliary-Controlled Diastereoselective Epoxidations.**2005** (7), 1047-72.

**145.** Bandini, M.; Melloni, A.; Tommasi, S.; Umani-Ronchi, A. A Journey Across Recent Advances in Catalytic and Stereoselective Alkylation of Indoles.**2005**, (8), 1199-222.

**Synthesis-Stuttgart**

**146.** Santaniello, E.; Ciuffreda, P.; Alessandrini, L. Synthesis of Modified Purine Nucleosides and Related Compounds Mediated by Adenosine Deaminase (ADA) and Adenylate Deaminase (AMPDA).**2005**, (4), 509-26.

**147.** Robina, I.; Vogel, P. Synthesis of Aza-*C*-Disaccharides (Dideoxyimino-Alditols C-Linked to Monosaccharides) and Analogues.**2005**, (5), 675-702.

**148.** Trost, B. M.; Ball, Z. T. Addition of Metalloid Hydrides to Alkynes: Hydrometallation with Boron, Silicon, and Tin.**2005**, (6), 853-87.

**149.** Maison, W.; Prenzel, A. H. G. P. Stereoselective Synthesis of Aza- and Diazabicyclo[X.Y.0]Alkane Dipeptide Mimetics.**2005**, (7), 1031-48.

**Tetrahedron**

**150.** Doku, G. N.; Verboom, W.; Reinhoudt, D. N.; van den Berg, A. On-Microchip Multiphase Chemistry-A Review of Microreactor Design Principles and Reagent Contacting Modes.**2005**, *61*(11), 2733-42.

**151.** Pellissier, H. Use of *O*-Glycosylation in Total Synthesis.**2005**, *61*(12), 2947-93.

**152.** Chinchilla, R.; Najera, C.; Yus, M. Functionalized Organolithium Compounds in Total Synthesis.**2005**, *61*(13), 3139-76.

**153.** Hyland, C. Cyclizations of Allylic Substrates via Palladium Catalysis.**2005**, *61*(14), 3457-71.

**154.** Jenner, G. Correlation between Pressure and Steric Interactions in Organic Reactions.**2005**, *61*(15), 3621-35.

**155.** Abd El-Wareth, A. O. S. Synthesis and Applications of Tetrathiafulvalenes and Ferrocene- Tetrathiafulvalenes and Related Compounds.**2005**, *61*(16), 3889-932.

**156.** Muzart, J. Palladium-Catalyzed Reactions of Alcohols. Part B: Formation of C-C and C-N Bonds from Unsaturated Alcohols.**2005**, *61*(17), 4179-212.

**157.** Romanenko, V. D.; Rudzevich, V. L. Silicon-Mercury Derivatives in Organic Synthesis.**2005**, *61*(19), 4509-30.

**158.** Liao, J.; Tao, J.; Lin, G.; Liu, D. Chemistry and Biology of Sphingolipids.**2005**, *61*(20), 4715-33.

**159.** Vazquez, S.; Camps, P. Chemistry of Pyramidalized Alkenes.**2005**, *61*(22), 5147-208.

**160.** Shimizu, H.; Nagasaki, I.; Saito, T. Recent Advances in Biaryl-Type Bisphosphine Ligands.**2005**, *61*(23), 5405-32.

**161.** Nishio, M. CH/ Hydrogen Bonds in Organic Reactions.**2005**, *61*(29), 6923-50.

**Tetrahedron-Assymetry**

**162.** Duhamel, L.; Duhamel, P.; Plaquevent, J.-C. Enantioselective Protonations: Fundamental Insights and New Concepts. **2004**, *15*(23), 3653-91.

**163.** Matsuda, T.; Harada, T.; Nakamura, K.; Ikariya, T. Asymmetric Synthesis Using Hydrolytic Enzymes in Supercritical Carbon Dioxide. **2005**, *16*(5), 909-15.

**164.** Afarinkia, K.; Bahar, A. Recent Advances in the Chemistry of Azapyranose Sugars. **2005**, *16*(7), 1239-87.

**Topics in Current Chemistry**

**165.** Mori, K. Pheromone Synthesis.**2004**, *239*(Chemistry of Pheromones and Other Semiochemicals I), 1-50.

**166.** Horn, J.; Michalek, F.; Tzschucke, C. C.; Bannwarth, W. Non-Covalently Solid-Phase Bound Catalysts for Organic Synthesis.**2004**, *242*(Immobilized Catalysts), 43-75.

**167.** Uozumi, Y. Recent Progress in Polymeric Palladium Catalysts for Organic Synthesis.**2004**, *242*(Immobilized Catalysts), 77-112.

**168.** Hiersemann, M.; Helmboldt, H. Recent Progress in the Total Synthesis of Dolabellane and Dolastane Diterpenes.**2005**, *243*(Natural Product Synthesis I), 73-136.

**169.** Kalesse, M. Recent Advances in Vinylogous Aldol Reactions and Their Applications in the Syntheses of Natural Products.**2005**, *244*(Natural Products Synthesis II), 43-76.

**170.** Beifuss, U.; Tietze, M. Methanophenazine and Other Natural Biologically Active Phenazines.**2005**, *244*(Natural Products Synthesis II), 77-113.

**171.** Knoelker, H.-J. Occurrence, Biological Activity, and Convergent Organometallic Synthesis of Carbazole Alkaloids.**2005**, *244*(Natural Products Synthesis II), 115-48.

**172.** Nubbemeyer, U. Recent Advances in Charge-Accelerated Aza-Claisen Rearrangements.**2005**, *244*(Natural Products Synthesis II), 149-213.

**173.** Metz, P. Synthetic Studies on the Pamamycin Macrodiolides.**2005**, *244*(Natural Products Synthesis II), 215-49.

**174.** Likos, C. N.; Ballauff, M. Equilibrium Structure of Dendrimers - Results and Open Questions.**2005**, *245*(Functional Molecular Nanostructures), 239-52.

**175.** Potrzebowski, M. J.; Kazmierski, S. High-Resolution Solid-State NMR Studies of Inclusion Complexes.**2005**, *246*(New Techniques in Solid-State NMR), 91-140.

**176.** Kaupp, G. Organic Solid-State Reactions with 100% Yield.**2005**, *254*(Organic Solid State Reactions), 95-183.

**Contributed Volumes**

**Targets Heterocyclic Systems. Chemistry and Properties. Volume 8 .** Attanasi, O. A., Spinelli, D., Eds., Societa Chimica Italiana: Rome, Italy, 2004.

**177.** Dini, D.; Yang, G. Y.; Hanack, M. Porphyrins, Phthalocyanines and Related Compounds as Materials for Optical Limiting.

**178.** Chiappe, C.; Pieraccini, D. Trihalide-based Imidazolium Salts as Versatile Reagents for the Halogenation of Unsaturated Compounds in Ionic Liquids 2.

**179.** Gil, A. M.; Buñuel, E.; Cativiela, C. An Extremely Versatile Methodology for the Synthesis of Enantiopure -Substituted Proline Analogues with the 7-Azanorbornane Skeleton.

**180.** Arcadi, A.; Bianchi, G. Application of Gold Catalysis in the Synthesis of Heterocyclic Systems.

**181.** Langa, F.; Oswald, F. Pyrazolino[60]fullerenes: Synthesis and Properties.

**182.** Fringuelli, F.; Pizzo, F.; Tortoioli, S.; Vaccaro, L. Thiolysis of 1,2-Epoxides under Environmentally Friendly Conditions.

**183.** Medel, R.; Plumet, J. Synthesis of Heterocyclic Compounds by [2+2] Cycloaddition to Oxa- and Aza-Norbornenic Systems (Including Carbometallation Reactions).

**184.** Troisi, L.; Granito, C.; Pindinelli, E. Properties, Synthesis and Functionalizations of -Lactams.

**185.** Karoyan, P.; Sagan, S.; Lequin, O.; Quancard, J.; Lavielle, S.; Chassaing, G. Substituted Prolines: Syntheses and Applications in Structure-Activity Relationship Studies of Biologically Active Peptides.

**186.** Funicello, M.; Spagnolo, P. Five-Membered Heteroaryl Azides and Derived Iminophosphoranes: Useful Intermediates for the Construction of -Fused Pyridine Ring Systems.

**187.** Pinho e Melo, T. M. V. D. 1,3-Thiazolidine-4-Carboxylic Acids as Building Blocks in Organic Synthesis.

**188.** Spanu, P.; Ulgheri, F. Advances in Asymmetric Synthesis of Biologically Active Molecules using Heterocycles as Building Blocks.

**189.** Pino-González, S.; Assiego, C.; Oñas, N. Syntheses of Polyhydroxylated Azepanes.

**190.** Bongiorno, D.; Camarda, L.; Ceraulo, L.; Ferrugia, M. Mass Spectrometry of Simple Indoles. Part 2: Fourier Transform Mass Spectrometry, Fast Atom Bombardment, Laser Desorption and Electrospray Ionisation.

**191.** Guarna, A.; Machetti, F.; Occhiato, E. G. Synthesis of Benzo[c]quinolizin-3-ones: Discovery and Development of Novel Inhibitors of Human Steroids 5 -Reductase.

**Monographs**

**192.** Breitmaier, E. Structure Elucidation by NMR in Organic Chemistry: A Practical Guide, 3rd Edition. John Wiley & Sons: Chichester, U.K., 2002.

**193.** Chapman, B. Transition Metals, Quantitative Kinetics and Applied Organic Chemistry. Nelson: Cheltenham, U.K., 2001.

**194.** Cornils, B.; Herrmann, W. A.; Editors Aqueous-Phase Organometallic Catalysis, 2nd Ed: Aqueous Phase Organometallic Catalysis. Wiley-VCH Verlag: Weinheim, Germany, 2004.

**195.** de Meijere, A.; Diederich, F.; Editors Metal-Catalyzed Cross-Coupling Reactions, Second, Completely Revised and Enlarged Edition: Volume 1. Wiley-VCH Verlag: Weinheim, Germany, 2004.

**196.** Donohoe, T. Oxidation and Reduction in Organic Synthesis. Oxford University Press: New York, 2000.

**197.** Eliel, E. L.; Wilen, S. H.; Doyle, M. P. Basic Organic Stereochemistry. Wiley: Chichester, U.K., 2001.

**198.** Finch, A. F.; Editor Theilheimer's Synthetic Methods of Organic Chemistry, Volume 57. Karger: Basel, Switzerland, 2000.

**199.** Gerson, F.; Huber, W. Electron Spin Resonance Spectroscopy for Organic Chemists. John Wiley & Sons: Chichester, U.K., 2003.

**200.** Herdewijn, P.; Editor Oligonucleotide Synthesis: Methods and Applications. [In: *Methods Mol. Biol.*; **2005**, *288*]. Humana Press Inc.: Totowa, NJ, 2005.

**201.** Hudlicky, M. Fluorine Chemistry for Organic Chemists: Problems and Solutions. Oxford University Press: New York, 2000.

**202.** Jacobsen, E. N.; Pfaltz, A.; Yamamoto, H.; Editors Comprehensive Asymmetric Catalysis, Supplement 2, 2004. Springer-Verlag: Berlin, Germany, 2004.

**203.** Jones, J. Amino Acid and Peptide Synthesis. Oxford University Press: Oxford, U.K., 2002.

**204.** Knipe, A. C.; Editor Organic Reaction Mechanisms 2000. John Wiley & Sons: Chichester, U.K., 2004.

**205.** Knipe, A. C.; Watts, W. E.; Editors Organic Reaction Mechanisms 1999. John Wiley & Sons: Chichester, U.K., 2004.

**206.** Luo, Y.-R. Handbook of Bond Dissociation Energies in Organic Compounds. CRC Press: Boca Raton, Florida, 2002.

**207.** Nishimura, S. Handbook of Heterogeneous Catalytic Hydrogenation for Organic Synthesis. Wiley: Chichester, U.K., 2001.

**208.** Olah, G. A.; Prakash, G. K. S.; Editors Carbocation Chemistry. John Wiley & Sons: Hoboken, NJ, 2004.

**209.** Padwa, A.; Editor Compounds with Two Carbon-Heteroatom Bonds: Heteroatom Analogues of Aldehydes and Ketones. [In: *Sci. Synth.*; **2004**, *27*]. Georg Thieme Verlag: Stuttgart, Germany, 2004.

**210.** Robertson, J. Protecting Group Chemistry. Oxford University Press: Oxford, U.K., 2001.

**211.** Seneci, P. Solid-Phase Synthesis and Combinatorial Technologies. John Wiley & Sons: New York, 2000.

**212.** Todres, Z. V. Organic Ion Radicals: Chemistry and Applications. Marcel Dekker: New York, 2002.

**213.** Vanelle, P.; Editor Electron Transfer Reactions in Organic Synthesis. Research Singpost: Trivandrum, India, 2002.

**214.** Workman, J., Jr. Handbook of Organic Compounds: NIR, IR, Raman, and UV-Vis Spectra Featuring Polymers and Surfactants, Volume 3; IR and Raman Spectra. Academic Press: San Diego, CA, 2001.

**Index**

Acetogenins, 109

Acetoxyethers, allylation, 3

Adenosine deaminase, purine modification, 146

Adenylate deaminase, purine modification, 146

Alcohols, Oppenauer oxidation, 136

Pd catalysis, 156

Aldehydes, with allylic stannanes, 3

Aldol reactions, vinylogous, 169

Alkaloids, carbazole, 171

cinchona, 140

imidazole, 107

indole, 106

isoquinoline, 108

lycopodium, 105

muscarine, 107

oxazole, 107

thiazole, 107

Alkenes, epoxidation, 32, 133-4

halogenation, book, 178

intramolecular coiodination, 77

pyramidalized, 159

ring-closing metathesis, 14

Alkyl phosphinates, 95

Alkylpyridine alkaloids, 120

Alkynes, cyclotrimerization, 60

halogenation, book, 178

hydrometallation, 148

metathesis, 128

Alkynyldimethylpyrimidopyridazine diones, 89

Allylstannanes, 115

Ambruticin antibiotics, 59

Amides, hydroxylation, 134

methanolysis, 27

Amines, N-alkylation, 136

Amino acids, -, cyclic, rigid, 123

constrained, 51, 57

methylation, 52

synthesis, book, 203

Aminoalkylsulfonates, 54

Aminophosphonic acids, 99

Antibiotics, deoxytetracycline, 130

tetracycline, 129

Arene hydroxylation, 133

Aromatics, C-H transformation, 67

photochemistry, 113

Asymmetric catalysis, book, 202

Asymmetric multicomponent reactions, 12

Azabicyclo[2.2.1]heptanes, book, 179

Azabicycloalkane dipeptide mimics, 149

Aza-C-Disaccharides, 147

Aza-Claisen rearrangement, charge-accelerated, 172

Azanorbornanes, book, 179

Azanorbornenes, [2+2] cycloaddition, book, 183

carbometallation, book, 183

Azapyranose sugars, 164

Azepanes, polyhydroxylated, book, 189

Azides, nitrogen compounds, 133

Aziridines, synthesis, 66

Azirines, from ethylene, 45

Azoles, fused, synthesis, 90

Azolopyridazines, synthesis, 90

Azoloquinolines, synthesis, 80

Benzophenanthridine alkaloids, synthesis, 79

Benzoquinolizinones, book, 191

Benzotellurophene, 43

Biaryl ligands, bisphosphine, 160

Bicycloalkanols, 25

BINAP ligands, asymmetric catalysis, 36

Biopolyphenolics, antioxidants, 114

Bond dissociation energies, book, 206

Bradykinin analogs, 53

Bromoenediynes, oligocyclization, 2

Bromoenynes, oligocyclization, 2

Bronsted acid-base catalyst, 13

Bronsted acids, combined, 15

Bryostatins, synthesis, 115

Calixarenes, naphthalene, 142

solid state NMR, 175

Calixnaphthalenes, 142

Carbazole alkaloids, 171

Carbenes, inside hemicarcerands, 20

Carbenoids, from diazoalkanes, 76

from diazocarbonyl, 76

with organic nitrogen, 76

Carbocations, book, 208

Carbohydrates, in stereoselective synthesis, 56

Carbon-diheteroatom bonds, book, 209

Catalysts, non-covalent immobilization, 166

C-H bond activation, with Au, book, 180

with Pt, 39

Chiral clusters, gas phase, 10

Chromophores, 5

Combinatorial chemistry, book, 211

organometallic, 70

Combinatorial libraries, 81

Combined acid catalysts, 15

Coumarins, functionalized, synthesis, 121

Cross coupling, metal catalysts, book, 195

tri-tert-buytlphosphine, 137

Crystal engineering, 139

Cyanohydrins, enantioselective, 143

Cyclizations, of allylics, 153

Cycloalkynes, synthesis, 7

Cyclodextrins, solid state NMR, 175

Cyclopentadienides, anions, borane analog, 101

iridium complex, 136

Cyclopentenones, synthesis, 24

Cyclophosphazenes, solid state NMR, 175

Cyclopropane, from ethylene, 45

in polycycles, 19

Cyclopropenes, nucleophilic addition, 69

Dendrimers, peptide, 34

structure, 174

Designer acids, 15

Diarylketenes, from diazoalkanes, 76

from diazocarbonyls, 76

with organic nitrogen, 76

Diastereomers, H-bond network resolution, 139

Diazabicycloalkane dipeptide mimics, 149

Diazenes, 88

Diazonaphthalenone photochemistry, 48

Dibenzotellurophene, 43

Dienones, photochemistry, 112

Dihydrooxaphospholes, 97

Dihydropyridines, synthesis, book, 188

Dihydropyrimidines, 118

Dihydroxyxanthone, antioxidants, 114

Dimethyl acetylenedicarboxylates, 83

Dimethyllumazine, 89

Dioxanones, synthesis, book, 188

Dioxolanes, synthesis, book, 188

Diterpenes, 168

Dithiafulvalene, 155

Dolabellane diterpenes, synthesis, 168

Dolastane diterpenes, synthesis, 168

Domino reactions, 26

Pd catalyst, 2

Electron transfer, book, 213

dissociative, intramolecular, 42

Encapsulation reactions, 16

Enolene rearrangement, 46

Enone cycloadditions, 112

Enynes, cycloisomerization, 19

electrophilic activation, 19

Epothilone B, synthesis, 115

Epoxidation, catalytic asymmetric, 33

chiral auxiliaries, 144

molecular oxygen, 38

Epoxides, thiolysis, book, 182

ESR spectroscopy, book, 199

Esters, methanolysis, 27

Ferrocenes, borane analogs, 101

tetrathiafulvalenes, 155

Fluorescence, single molecule detection, 5

Fluorine chemistry, book, 201

Fullerenes, multifunctionalization, 71

solid state NMR, 175

Furans, in synthesis, 116-7

Paterno-Buechi reaction, 8

synthesis, book, 188

Furanosides, via amino acid catalysts, 17

Glycosides, synthesis, 121

Glycosylation, natural products, 151

Gold catalysts, book, 180

Halogen bonding, 1

Halogenation, electrophilic, 18

Hamigerans, 110

Heteroaryl azides, book, 186

Heterocumulenes, catalyzed reactions, 64

Heterocycles, 44

alkene intramolecular coiodination, 77

benzoannelation, 82

dicarbozylates, 83

gold catalysts, book, 180

gem-disubstituent effect, 35

Pd catalysis, 65

phosphorus, 92, 97

polycyclic, cyclopropane, 19

S-, 6-membered rings, 41

with microwaves, 75

Heterocyclic phosphoranes, 92

Hydrocarbon oxidation, enol intermediates, 131

Hydroformylation, branched selectivity, 68

Hydrogen bonds, laser excitation, 127

metal hydrides, 6

organometallic, 6

 carbon, 161

Hydrogenation, heterogeneous catalysts, book, 207

Hydrolytic enzymes, in supercritical CO2, 163

Hypophosphorous compounds, 95

Imidazoles, synthesis, book, 188

Iminium ylides, from carbenes, 125

from metallocarbenoids, 125

Iminophosphoranes, book, 186

Inclusion complexes, solid state NMR, 175

Indoles, Friedel-Crafts alkylation, 145

Indoles, from amino alcohols, 136

mass spectrometry, book, 190

Iodolactones, 77

Iodotetrahydrofurans, 77

Iodotetrahydropyrans, 77

Ion pairs, dynamics, 9

Ionic liquids, 103

chiral, 50

room temperature, 74

Isoxazoles, 73

Ketones, from alcohols, 133

hydroxylation, 134

Kinetics, quantitative, book, 193

Lactams, -, book, 184

Lewis acids, indium tribromide, 138

Libraries, small bioactive molecules, 119

Lipases, kinetic resolution, 49

Macrocycles, host-guest complexes, 61

Mesoionic rings, 4

Metalloboranes, with acetylenes, 102

with isocyanides, 102

Methanophenazine, 170

Methyl cyanide, HOF complex, 133

Microreactors, multiphase, 150

Microwaves, heterocyle synthesis, 75

Molecular rotors, 30

Natural product synthesis, amaryllidaceae, 132

Nazarov reaction, 47

Nickel(0) catalysts, 141

Nitropyridines, 93

Nitroxide radicals, 91

NMR, book, 192

Nucleophiles, N-, amination, 134

Nucleosides, 2'-modified, 122

modified purine, 146

Olefin metathesis, 26

with carbenes, 23

Oligomers, conjugated, 21

Oligonucleotides, 2'-modified, 122

synthesis, book, 200

Oligopeptidosulfonamides, 54

Organic ion radicals, book, 212

Organocatalysts, cinchona alkaloids, 140

Organolithium compounds, 11

natural product synthesis, 152

Organometallic catalysis, aqueous, book, 194

Organometallics, ion pairing, 37

Organopalladium, oligocyclization, 2

Organophosphorus  systems, 98

Oxadiazoles, synthesis, 88

Oxazaphosphinanes, 97

Oxazines, synthesis, book, 188

Oxaziridines, 134

Oxazoles, synthesis, book, 188

Oxidation, book, 196

molecular oxygen, 38

Oxonorbonenes, carbometallation, book, 183

[2+2] cycloaddition, book, 183

Palladacycles, 40

Palladium catalysts, polymer supported, 167

Palladium cross-coupling, aqueous, 63

Pamamycin, macrodiolides, 173

synthesis, 115

Pancratistatin synthesis, 132

Pauson-Khand reaction, intermolecular, 24

with Co nanoparticles, 135

Peptide drugs, design, 53

Peptides, dendrimers, 34

synthesis, book, 203

Peptidomimetics, rigid cyclic -amino acids, 123

Phenazines, bacterial, 170

Phenolic acids, non-isoprene, 120

Phenylethylamines, 108

Pheromones, synthesis, 165

Phosphates, phosphoryl transfer, 58

Phosphinates, phosphoryl transfer, 58

Phosphinine ligands, 96

Phosphinopeptides, 55

Phosphinous acids, 94

Phosphiranes, from phosphinidenes, 45

Phospholes, 92

Phosphonopeptides, 55

Photosensitizers, 72

Phthalocyanines, optical limiting, book, 177

Polycyclic carbocyles, from enynes, 19

Polycyclic ethers, marine, allylation, 3

Polyketides, 15-carbon, 116

Polymers, amphiphilic, 121

IR and Raman spectra, book, 214

Polyols, synthesis, 121

Polypeptide ligands, constrained, 51

Polyphenols, synthesis, 121

Porphyrins, optical limiting, book, 177

Pressure, and steric interactions, 154

Prolines, analogs, book, 179, 185

Protecting groups, book, 210

Protonation, enantioselective, 162

Pyramidalized alkenes, 159

Pyranosides, via amino acid catalysts, 17

Pyrazines, synthesis, book, 188

Pyrazoles, andtioxidants, 114

Pyrazolino[60]fullerenes, book, 181

Pyrazolylacrylonitriles, antioxidants, 114

Pyridazines, 3-amino, 85

3-hydrazino, 85

synthesis, 83

Pyridazinones, 84

Pyridazinoquinoxalines, synthesis, 87

Pyridines, -fused, book, 186

Pyrimidines, synthesis, book, 188

Pyrimidopyridazinediones, 86

Pyrones, synthesis, book, 188

Pyrroles, synthesis, book, 188

Quinolines, hydrogenation, 136

Quinones, photochemistry, 112

Reaction mechanisms, book, 204-5

Reaction rates, no barrier theory, 28

Reduction, book, 196

Signal transduction, probes, 119

Silylation, silyl mercurials, 157

Solid phase synthesis, book, 211

organometallic, 70

Solid state reactions, 176

Solvents, supercritical CO2, 163

Somatostatin analogs, 53

Sphingolipids, 158

Spin catalysis, 124

Stereochemistry, book, 197

Stetter reaction, asymmetric, 22

Sulfonamides, synthesis, 66

Sulfonamidopeptides, 54

Supercritical fluids, probe molecules, 104

Supramolecules, halogen bonded, 1

-conjugated, 31

Suzuki aryl-aryl coupling, green, 62

Suzuki coupling, aqueous, 29

Synthesis, book, 198

Tetrahydroquinolines, 1,2,3,4-, 136

Tetrathiafulvalenes, 155

Thiazoles, synthesis, book, 188

Thiazolidinecarboxylic acids, book, 187

Thienothiophenea, 126

Thioisomuenchnones, 4

Three component reactions, 111

Thymines, photochemistry, 112

Transition metals, book, 193

Triazoles, synthesis, 88

Tri-tert-butylphosphine ligands, 137

Ultrasound, 78

Vinylmetalloids, synthesis, 148

Vinylphosphonates, synthesis, 100
